# Supplementary material
Source: PubMed Central journal article supplement (PMC7383324)
Supplement: JZUSB21-0571-ESM.pdf [file JZUSB21-0571-ESM.pdf]

## Hyaluronic acid derivative-modified nano-structured lipid carrier for cancer targeting and therapy<sup>\*#</sup>

Xiao LIU<sup>†1</sup>, Hai LIU<sup>2</sup>, Su-lan WANG<sup>1</sup>, Jing-wen LIU<sup>3</sup>

<sup>1</sup>Department of Pharmacy, Sir Run Run Shaw Hospital, School of Medicine, Zhejiang University, Hangzhou 310016, China

<sup>2</sup>Department of Radiotherapy, Sir Run Run Shaw Hospital, School of Medicine, Zhejiang University, Hangzhou 310016, China

<sup>3</sup>Department of Pharmacological and Pharmaceutical Sciences, College of Pharmacy, University of Houston, Houston TX 77030, USA

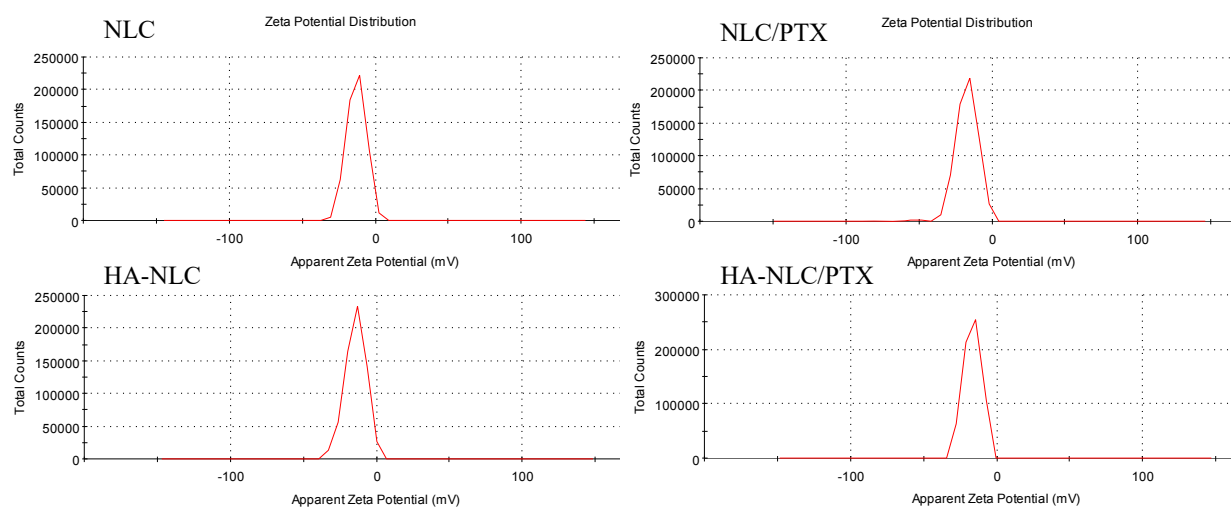

**Fig. S1 Zeta potential determination of the nanoparticles (NLC, NLC/PTX, HA-NLC, and HA-NLC/PTX)**

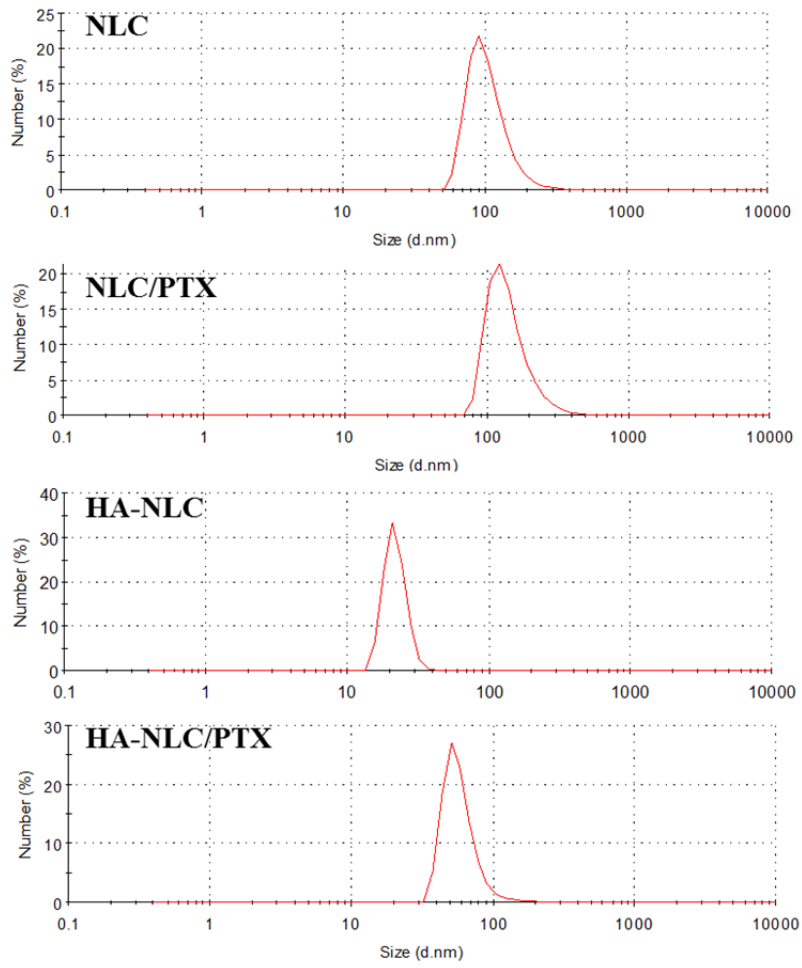

**Fig. S2** Size distribution of the nanoparticles (NLC, NLC/PTX, HA-NLC, and HA-NLC/PTX) at the 10th day they after were prepared
